# Supplementary material
Source: Springer Nature journal article supplement (https://www.springermedizin.de/resource/supplementary/13063_2014_2322_MOESM2_ESM.pdf/9621892)
Supplement: MOESM2 [file 9621892]

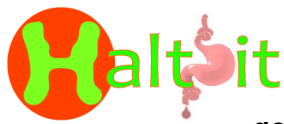

# OUTCOME

Complete at discharge from the randomising hospital, death in hospital or 28 days after randomisation, whichever occurs first

Attach treatment pack sticker or write box/pack number:  
[ ] [ ] [ ] / [ ] [ ]

## 1. HOSPITAL

|                  |  |
|------------------|--|
| a) Country       |  |
| b) Hospital code |  |

## 2. PATIENT DETAILS

|                                                             |       |      |
|-------------------------------------------------------------|-------|------|
| a) Initials                                                 | first | last |
| b) Age at entry                                             |       |      |
| c) Written consent obtained from patient or representative? | YES   | NO   |
| d) If no written consent, give reason                       |       |      |

## 3. PATIENT STATUS

|                                                                                   |                                                                                                                                                                                                                                                                                                             |         |      |
|-----------------------------------------------------------------------------------|-------------------------------------------------------------------------------------------------------------------------------------------------------------------------------------------------------------------------------------------------------------------------------------------------------------|---------|------|
| <b>3.1 Death in hospital</b> (if yes complete below – if no complete 3.2)         |                                                                                                                                                                                                                                                                                                             |         |      |
| a) Date of death                                                                  | dd                                                                                                                                                                                                                                                                                                          | mm      | yyyy |
| b) Time of death (24-hr clock)                                                    | hours                                                                                                                                                                                                                                                                                                       | minutes |      |
| c) Main cause of death (tick one option only)                                     | <input type="checkbox"/> Haemorrhage <input type="checkbox"/> Malignancy<br><input type="checkbox"/> Myocardial infarction <input type="checkbox"/> Pneumonia<br><input type="checkbox"/> Stroke <input type="checkbox"/> Pulmonary embolism<br><input type="checkbox"/> Other (describe, 1 diagnosis only) |         |      |
| <b>3.2 Patient alive</b> (if yes complete one section below – if no complete 3.1) |                                                                                                                                                                                                                                                                                                             |         |      |
| a) Discharged from hospital? (Date)                                               | dd                                                                                                                                                                                                                                                                                                          | mm      | yyyy |
| b) Still in hospital at day 28? (Date)                                            | dd                                                                                                                                                                                                                                                                                                          | mm      | yyyy |

## 4. PROCEDURES (circle one option on each line)

|                                       |     |    |
|---------------------------------------|-----|----|
| a) Diagnostic endoscopic procedure    | YES | NO |
| b) Therapeutic endoscopic procedure   | YES | NO |
| c) Diagnostic radiological procedure  | YES | NO |
| d) Therapeutic radiological procedure | YES | NO |
| e) Surgical intervention              | YES | NO |

## 5. PRIMARY CAUSE OF BLEED (tick one option only)

| UPPER GI BLEED                                   | LOWER GI BLEED                                |
|--------------------------------------------------|-----------------------------------------------|
| <input type="checkbox"/> Erosion or peptic ulcer | <input type="checkbox"/> Diverticular disease |
| <input type="checkbox"/> Varices                 | <input type="checkbox"/> Colitis              |
| <input type="checkbox"/> Vascular lesion         | <input type="checkbox"/> Vascular lesion      |
| <input type="checkbox"/> Malignancy              | <input type="checkbox"/> Malignancy           |
| <input type="checkbox"/> Other/unknown           | <input type="checkbox"/> Infection            |
|                                                  | <input type="checkbox"/> Other/unknown        |

## 6. TRIAL TREATMENT (only circle YES if complete dose given)

|                           |     |    |
|---------------------------|-----|----|
| a) Loading dose given     | YES | NO |
| b) Maintenance dose given | YES | NO |

## 7. OTHER TREATMENTS (circle one option on each line)

|                                      |     |    |
|--------------------------------------|-----|----|
| a) Helicobacter pylori eradication   | YES | NO |
| b) H2 receptor antagonists           | YES | NO |
| c) Proton pump inhibitors            | YES | NO |
| d) Vasopressin / analogue            | YES | NO |
| e) Antibiotics for variceal bleeding | YES | NO |
| f) Antifibrinolytics                 | YES | NO |

## 8. BLOOD PRODUCTS TRANSFUSION (if none enter 0)

|                                                     |       |    |
|-----------------------------------------------------|-------|----|
| a) Were blood products transfused?                  | YES   | NO |
| b) Units whole blood/red cells (part unit = 1 unit) | units |    |
| c) Frozen plasma (part unit = 1 unit)               | units |    |
| d) Platelets (part unit = 1 unit)                   | units |    |

## 9. MANAGEMENT (if none enter 0)

|                                       |      |
|---------------------------------------|------|
| a) Days in Intensive Care Unit (ICU)  | days |
| b) Days in High Dependency Unit (HDU) | days |

## 10. COMPLICATIONS (circle one option on each line)

|                                    |     |    |
|------------------------------------|-----|----|
| a) Re-bleeding                     | YES | NO |
| b) Deep vein thrombosis            | YES | NO |
| c) Pulmonary embolism              | YES | NO |
| d) Stroke                          | YES | NO |
| e) Myocardial infarction           | YES | NO |
| f) Other significant cardiac event | YES | NO |
| g) Sepsis                          | YES | NO |
| h) Pneumonia                       | YES | NO |
| i) Respiratory failure             | YES | NO |
| j) Liver failure                   | YES | NO |
| k) Renal failure                   | YES | NO |
| l) Seizures                        | YES | NO |

Any complications not listed above – please report as per protocol using an Adverse Event Reporting form.

## 11. PATIENT'S SELF CARE CAPACITY (circle one option on each line)

|                                                                                                                                                                   | INDEPENDENT? |    |
|-------------------------------------------------------------------------------------------------------------------------------------------------------------------|--------------|----|
| a) Bathing (sponge bath, tub bath, or shower) – Receives either no assistance or assistance in bathing only one part of body                                      | YES          | NO |
| b) Dressing – Gets clothed and dressed without assistance except for tying shoes                                                                                  | YES          | NO |
| c) Toileting – Goes to toilet room, uses toilet, arranges clothes, and returns without assistance (may use cane or walker for support and bedpan/urinal at night) | YES          | NO |
| d) Transferring – Moves in and out of bed and chair without assistance (may use cane or walker)                                                                   | YES          | NO |
| e) Continence – Controls bowel and bladder completely by self (without occasional 'accidents')                                                                    | YES          | NO |
| f) Feeding – Feeds self without assistance (except for help with cutting meat or buttering bread)                                                                 | YES          | NO |

## UK ONLY – PATIENT IDENTIFIERS

|                  |            |             |
|------------------|------------|-------------|
| a) Name          | first name | family name |
| b) Date of birth | dd         | mm yyyy     |
| c) Post code     |            |             |
| d) NHS number    |            |             |

## 12. PERSON COMPLETING FORM (PI is responsible for data submitted)

|              |            |           |
|--------------|------------|-----------|
| a) Name      | first name | last name |
| b) Position  |            |           |
| c) Signature |            |           |
| d) Date      | dd         | mm yyyy   |

SEE GUIDANCE NOTES ON REVERSE

**DETAILED GUIDANCE ABOUT COMPLETING THIS FORM CAN BE FOUND IN YOUR INVESTIGATORS STUDY FILE**

**AFTER COMPLETING THIS PAPER FORM, YOU CAN:**

- ❖ Enter these data directly into the trial database. For username and password, please contact **haltit.data@Lshmt.ac.uk**
- ❖ Send as a secure scanned document by email to **haltit.data@Lshmt.ac.uk** or upload a scanned copy at **<http://ctu-files.Lshmt.ac.uk>**.
- ❖ Fax to **+44 20 7299 4663**

**STORE THIS ORIGINAL FORM IN YOUR SITE FILE**
